# Supplementary material
Source: publisher figshare collection journal article supplement (https://gsajournals.figshare.com/articles/dataset/_/6207317)
Supplement: Supplementary file 1 [file 1]

| **Table S1. Transcriptome reads statistics** | |  |  |
| --- | --- | --- | --- |
|  | *T. dubius* | *T. porrifolius* | *T. pratensis* |
| Total reads (raw) | 265,039,700 | 245,758,347 | 310,818,352 |
|  |  |  |  |
| Trimmed reads (-10) |  |  |  |
| Total | 128,497,276 | 192,126,423 | 125,764,660 |
| Paired R1 | 55,464,553 | 82,627,936 | 55,078,407 |
| Paired R2 | 55,464,553 | 82,627,936 | 55,078,407 |
| Unpaired R1 | 9,458,107 | 15,825,777 | 8,703,692 |
| Unpaired R2 | 8,110,063 | 11,044,774 | 6,904,154 |
|  |  |  |  |
| Trimmed reads (+10) |  |  |  |
| Total | 146,282,794 | 141,956,167 | 203,758,251 |
| Paired R1 | 63,620,351 | 62,703,061 | 88,542,746 |
| Paired R2 | 63,620,351 | 62,703,061 | 88,542,746 |
| Unpaired R1 | 11,122,384 | 10,028,771 | 16,840,021 |
| Unpaired R2 | 7,919,708 | 6,521,274 | 9,832,738 |

| **Table S2. Assembly isoform reconstruction** | |  |  |
| --- | --- | --- | --- |
|  | *T. dubius* | *T. porrifolius* | *T. pratensis* |
| Trinity (+10) | 123,908 | 135,921 | 144,297 |
| Trinity (-10) | 113,174 | 125,263 | 135,517 |
| CAP3 Input contigs | 237,082 | 261,184 | 279,814 |
| Output contigs | 89,039 | 94,402 | 97,619 |
| Output singletons | 120,435 | 151,507 | 173,488 |
| Output total | 209,474 | 245,909 | 271,107 |

| **Table S3. Stepwise Assembly Statistics** | | | |  |  |  |  |  |  |
| --- | --- | --- | --- | --- | --- | --- | --- | --- | --- |
|  | *T. dubius* | | | *T. porrifolius* | | | *T. pratensis* | | |
|  | CAP3.1 | CAP3.2 | Biopython | CAP3.1 | CAP3.2 | Biopython | CAP3.1 | CAP3.2 | Biopython |
| Count | 209,474 | 118,274 | 105,282 | 245,909 | 131,519 | 116,777 | 271,107 | 138,704 | 122,024 |
| Mean | 1,125.0 | 1,245.5 | 1,140.2 | 1,122.7 | 1,229.5 | 1,120.6 | 1,140.2 | 1,256.9 | 1,152.8 |
| N50 | 1,708 | 1,868 | 1,753 | 1,690 | 1,846 | 1,718 | 1,668 | 1,833 | 1,725 |
| Min | 201 | 201 | 201 | 201 | 201 | 201 | 201 | 201 | 201 |
| Max | 21,848 | 21,848 | 21,848 | 20,367 | 20,367 | 20,367 | 27,263 | 27,263 | 27,263 |

| **Table S4. Program Version Information** | | |
| --- | --- | --- |
|  | Program | Version |
|  | bedtools | 2.24.0 |
|  | Biopython | 1.65 |
|  | Bowtie | 0.12.9 |
|  | CAP3 | 2012-07-05 |
|  | Cutadapt | 1.7.1 |
|  | HMMER | 3.1b1 |
|  | Last | 531 |
|  | MAFFT | 7.127 |
|  | NCBI BLAST | 2.2.29 |
|  | Rnammer | 1.2 |
|  | SignalP | 4.1c |
|  | tmhmm | 2.0c |
|  | Trimmomatic | 0.32 |
|  | Trinity | 2013-02-25 |
|  | Trinotate | 3.0.1 |
|  | WU-BLAST | 2.0 |

| **Table S5. R session info** | |  |  |  |  |  |
| --- | --- | --- | --- | --- | --- | --- |
| PG model | R version 3.0.2 (2013-09-25) | | |  |  |  |
|  | Platform: x86_64-unknown-linux-gnu (64-bit) | | | |  |  |
|  |  |  |  |  |  |  |
|  | locale: |  |  |  |  |  |
|  | [1] LC_CTYPE=en_US.UTF-8 LC_NUMERIC=C | | | | |  |
|  | [3] LC_TIME=en_US.UTF-8 LC_COLLATE=en_US.UTF-8 | | | | |  |
|  | [5] LC_MONETARY=en_US.UTF-8 LC_MESSAGES=en_US.UTF-8 | | | | | |
|  | [7] LC_PAPER=en_US.UTF-8 LC_NAME=C | | | | |  |
|  | [9] LC_ADDRESS=C LC_TELEPHONE=C | | | | |  |
|  | [11] LC_MEASUREMENT=en_US.UTF-8 LC_IDENTIFICATION=C | | | | |  |
|  |  |  |  |  |  |  |
|  | attached base packages: | |  |  |  |  |
|  | [1] stats graphics grDevices utils datasets methods base | | | | |  |
|  |  |  |  |  |  |  |
|  | loaded via a namespace (and not attached): | | | |  |  |
|  | [1] tools_3.0.2 | |  |  |  |  |
|  |  |  |  |  |  |  |
| voom | R version 3.2.0 (2015-04-16) | | |  |  |  |
|  | Platform: x86_64-unknown-linux-gnu (64-bit) | | | |  |  |
|  | Running under: Red Hat Enterprise Linux Server release 6.8 (Santiago) | | | | | |
|  |  |  |  |  |  |  |
|  | locale: |  |  |  |  |  |
|  | [1] LC_CTYPE=en_US.UTF-8 LC_NUMERIC=C | | | | |  |
|  | [3] LC_TIME=en_US.UTF-8 LC_COLLATE=en_US.UTF-8 | | | | |  |
|  | [5] LC_MONETARY=en_US.UTF-8 LC_MESSAGES=en_US.UTF-8 | | | | | |
|  | [7] LC_PAPER=en_US.UTF-8 LC_NAME=C | | | | |  |
|  | [9] LC_ADDRESS=C LC_TELEPHONE=C | | | | |  |
|  | [11] LC_MEASUREMENT=en_US.UTF-8 LC_IDENTIFICATION=C | | | | |  |
|  |  |  |  |  |  |  |
|  | attached base packages: | |  |  |  |  |
|  | [1] stats graphics grDevices utils datasets methods base | | | | |  |
|  |  |  |  |  |  |  |
|  | other attached packages: | |  |  |  |  |
|  | [1] edgeR_3.12.1 limma_3.26.9 | | |  |  |  |
